1 **DIFFERENTIAL SARS-COV-2 ANTIGEN SPECIFICITY OF THE HUMORAL**  
2 **RESPONSE IN INACTIVATED VIRUS-VACCINATED, CONVALESCENT, AND**  
3 **BREAKTHROUGH SUBJECTS**

4 Luisa F. Duarte<sup>1#</sup>, Yaneisi Vázquez<sup>1#</sup>, Benjamín Diethelm-Varela<sup>1#</sup>, Valentina Pavez<sup>1</sup>,  
5 Roslye Berríos-Rojas<sup>1</sup>, Jessica A. White<sup>2</sup>, Alexis M. Kalergis<sup>1,3</sup>, Susan M. Bueno<sup>1</sup> and Pablo  
6 A. González<sup>1\*</sup>

7

8 <sup>1</sup>Millennium Institute on Immunology and Immunotherapy, Departamento de Genética  
9 Molecular y Microbiología, Facultad de Ciencias Biológicas, Pontificia Universidad Católica  
10 de Chile, Santiago, Chile.

11 <sup>2</sup>PATH, 2201 Westlake Avenue, Suite 200, Seattle, WA 98121, USA

12 <sup>3</sup>Departamento de Endocrinología, Facultad de Medicina, Pontificia Universidad Católica de  
13 Chile, Santiago, Chile.

14 # Equal contribution.

15 \*Correspondence to: [pagonzalez@bio.puc.cl](mailto:pagonzalez@bio.puc.cl)

16

17 **Keywords:** Inactivated Vaccine, CoronaVac, SARS-CoV-2, antigens, differential diagnosis,  
18 biomarkers

19 **Abbreviations:** Severe Acute Respiratory Syndrome Coronavirus 2 (SARS-CoV-2); The  
20 etiological agent of coronavirus disease 2019 (COVID-19); World Health Organization  
21 (WHO); Geometric mean titer (GMT); Receiver operating characteristic (ROC); Polymerase  
22 chain reaction (PCR); Optical density (OD); Binding antibody units (BAU); Area under the  
23 curve (AUC).

24

25 **ABSTRACT**

26 Analytical methods for the differential determination between natural infection with SARS-  
27 CoV-2 vs. immunity elicited by vaccination or infection after immunization (breakthrough  
28 cases) represent attractive new research venues in the context of the ongoing COVID-19  
29 pandemic caused by Severe Acute Respiratory Syndrome coronavirus 2 (SARS-CoV-2).  
30 Herein, we set out to compare humoral responses against several SARS-CoV-2 structural and  
31 non-structural proteins in infected unvaccinated (convalescent), vaccinated, as well as  
32 vaccinated and infected (breakthrough) individuals. Our results indicate that immunization  
33 with an inactivated SARS-CoV-2 vaccine (CoronaVac) induces significantly higher levels  
34 of IgG antibodies against the membrane (M) protein of SARS-CoV-2 as compared to  
35 convalescent subjects both, after the primary vaccination schedule and after a booster dose.  
36 Moreover, we found that CoronaVac-immunized individuals, after receiving a third vaccine  
37 shot, display equivalent levels of N-specific IgG antibodies as convalescent subjects.  
38 Regarding non-structural viral proteins, for the two viral proteins ORF3a and NSP8, IgG  
39 antibodies were produced in more than 50% of the convalescent subjects. Finally, a logistic  
40 regression model and a receiver operating characteristic (ROC) analysis show that combined  
41 detection of M and N proteins may be useful as a biomarker to differentiate breakthrough  
42 cases from vaccinated and convalescent individuals that did not receive prior vaccination.  
43 Taken together, these results suggest that multiple SARS-CoV-2 antigens may be used as  
44 differential biomarkers for distinguishing natural infection from vaccination.

## 45 1. INTRODUCTION

46 Severe Acute Respiratory Syndrome coronavirus 2 (SARS-CoV-2), the etiological  
47 agent of coronavirus disease 2019 (COVID-19), produces significant morbidity and mortality  
48 worldwide that has caused significant strain on public health systems, altogether imposing  
49 severe social and economic burdens to nations around the globe [1,2]. Starting the year 2021,  
50 most countries worldwide have deployed massive vaccination campaigns that successfully  
51 curb the worst outcomes of COVID-19. However, the immune responses elicited in  
52 convalescent individuals, the vaccinated, and those vaccinated and infected (breakthrough)  
53 cases remain to be studied in depth in the upcoming years in such a way to identify and better  
54 understand potential correlates of protection against infection with this virus [3]. Worldwide,  
55 more than a dozen vaccines have been approved by the World Health Organization (WHO),  
56 which are based on different technological platforms, compositions and administration  
57 schedules [4,5]. Importantly, whole inactivated SARS-CoV-2 vaccines account for nearly  
58 half of the total number of doses administered in the world population, and CoronaVac  
59 (Sinovac Biotech) has been approved in over 30 countries within mass vaccination  
60 campaigns in low and middle-income countries [6], with favorable safety and  
61 immunogenicity results [7–10]. The efficacy and effectiveness of this vaccine against  
62 COVID-19-related hospitalizations and deaths are significant [11–16], especially when  
63 immunity is reinforced with a booster dose [17–20].

64 Whole-virus vaccines have a variety of structural viral antigens, many of which are  
65 not present in mRNA- or vector-based vaccines [7]. Importantly, whole-virus vaccines may  
66 elicit, to some extent, immune responses that mimic natural infection with SARS-CoV-2.  
67 However, because the profile of antigenic proteins presented in the context of infectious virus  
68 and contained in the inactivated viral particles within the vaccine are not identical, we

69 hypothesized that natural infection versus inactivated-virus vaccination or breakthrough  
70 cases elicits differential humoral responses against SARS-CoV-2 proteins. Thus, we sought  
71 to identify these putative differences, which could eventually be used as biomarkers for the  
72 differential serodiagnosis of individuals naturally infected with SARS-CoV-2 versus those  
73 immunized with inactivated-virus vaccine or breakthrough cases undergoing infection after  
74 vaccination.

75         The SARS-CoV-2 genome encodes four structural proteins, namely Spike (S),  
76 nucleocapsid (N), membrane (M), and envelope (E), and 16 non-structural proteins (NSP1-  
77 NSP16), along with several accessory proteins (ORF3a, 3d, 6, 7a, 7b, 8, 9b, 14, and 10) that  
78 play key roles in immune evasion and the replication cycle of the virus [21,22]. Among these  
79 proteins, the viral structural protein S is highly immunogenic, and the induction of binding-  
80 and neutralizing anti-S antibodies by vaccines against SARS-CoV-2 have been the focus of  
81 extensive investigation during the last two years [23–27]. However, antibodies against other  
82 SARS-CoV-2 proteins, such as those produced against virus-inactivated vaccines, are less  
83 known and thus, require further characterization for a better understanding of the kinetics  
84 and extent of the host immune profiles generated against this virus and potentially identifying  
85 correlates of protection.

86         In this study, we compared the humoral immune responses elicited against the N, M,  
87 and E-structural proteins of SARS-CoV-2, as well as the non-structural ORF3a, and NSP8  
88 proteins of this virus among unvaccinated convalescent individuals that survived SARS-  
89 CoV-2 infection, and subjects immunized with the SARS-CoV-2-inactivated CoronaVac  
90 vaccine at different stages during their vaccination and booster schedule. We also analyzed  
91 and compared this humoral response in CoronaVac-vaccinated individuals later infected with  
92 SARS-CoV-2 (breakthrough cases) [17]. Overall, our data show that anti-N IgG antibodies

93 are produced significantly in the vaccinated group only after administering a booster dose of  
94 CoronaVac, and anti-M IgG antibody titers were higher in the vaccinated group as compared  
95 to convalescent individuals. Conversely, convalescent individuals displayed high titers of  
96 anti-N antibodies, which remained elevated for at least eight weeks after recovery from  
97 SARS-CoV-2 infection. These individuals also displayed a seropositivity rate above 50% for  
98 the NSP8 protein. Regarding breakthrough cases, an antibody pattern characteristic of an  
99 anamnestic immune response was elicited, resulting in a substantial boost of titers against  
100 surface antigens within the virus. Finally, we performed a receiver operating characteristic  
101 (ROC) analysis to differentiate breakthrough cases between vaccinated volunteers and  
102 convalescent individuals without previous vaccination. Importantly, we found at the protein  
103 level that the antibody responses against the combination of the N and M viral proteins may  
104 serve to discriminate between these individuals with an appropriate cutoff criterion.

## 105 2. MATERIALS AND METHODS

### 106 2.1 Subjects

107 Serum samples from subjects between 18 to 59 years and older than 60 years  
108 belonging to the CoronaVac03CL Phase 3 scientific-clinic study carried out in Chile were  
109 obtained from the following groups: i) pre-immune: sera obtained at the moment of the first  
110 dose, ii) second dose + 2 weeks: sera obtained from subjects vaccinated with the second dose  
111 of CoronaVac (28 days post-first dose) plus two weeks, iii) second dose + 4w: sera from  
112 subjects vaccinated with the second dose of CoronaVac plus four weeks, iv) third dose + 4w:  
113 sera from subjects vaccinated with the booster dose of CoronaVac (6 months after the first  
114 dose) plus four weeks, vi) breakthrough + 2w: serum obtained from subjects vaccinated with  
115 two doses of CoronaVac and then naturally infected with SARS-CoV-2, from whom the  
116 samples were taken two weeks after a positive polymerase chain reaction (PCR) test, and vii)  
117 breakthrough + 4w: serum from subjects vaccinated with two doses of CoronaVac and  
118 infected with SARS-CoV-2, from whom the sample was taken four weeks after a positive  
119 PCR test. At least 25 subjects were evaluated for the vaccinated group and 10 for the  
120 breakthrough cases. Sera obtained from the biobank of clinical samples within the PATH  
121 institution was grouped as follows: i) naive: sera from 10 subjects who were not exposed to  
122 the virus and were taken before the year 2020, ii) convalescents: sera from 9 subjects who  
123 were infected with SARS-CoV-2 and then blood samples were taken for serum recollection  
124 at 1, 2, 4 and 8 weeks after symptom-onset, iii) 10 samples obtained from convalescent  
125 subjects that were classified with low, mid and high titer against SARS-CoV-2, but the time  
126 of the sample collection was not detailed (unspecified). The age of these subjects was  
127 unknown. Table 1 summarizes the description of all samples included in this study. Blood  
128 samples were obtained from volunteers recruited in the clinical trial CoronaVac03CL

129 (clinicaltrials.gov #NCT04651790) carried out in Chile starting in November 2020. The  
130 study was approved by the sponsoring institution Ethical Committee (ID 200708006), each  
131 Institutional Ethical Committee of the other sites, and the Public Health Institute of Chile  
132 (ISP Chile, number 24204/20). Execution of the trials was conducted according to the current  
133 Tripartite Guidelines for Good Clinical Practices, the Declaration of Helsinki and local  
134 regulations.

## 135 **2.2 Dot blot**

136 To immobilize recombinant proteins on a solid matrix, 500 ng of each protein was  
137 diluted in 20 mM phosphate buffer (mixture of monobasic and dibasic phosphate), 0.5 M  
138 NaCl, and 8 M urea were spotted onto a nitrocellulose membrane (in 2 uL volume) (Thermo  
139 Scientific). Membranes with spots were air-dried for 15 min and subsequently blocked with  
140 10% BSA diluted in 0.05% Tween-20 in PBS, for 2 h at RT. After incubation, the membranes  
141 were washed with 0.05% Tween-20 in PBS (twice). Next, the membranes were incubated  
142 overnight at 4°C with a sera pool from naive, convalescents (+ 4 weeks), vaccinated with  
143 second dose + 2 weeks, and breakthrough (PCR(+)) + 2 weeks subjects. A sera pool was  
144 incubated in a dilution of 1/250 with 1% BSA diluted in 0.05% Tween-20 in PBS. As positive  
145 control, all proteins (500 ng) were incubated with an anti-His Tag antibody conjugated with  
146 biotin at a dilution of 1:3,000 in 1% BSA diluted in 0.05% Tween-20 in PBS (Supplementary  
147 Figure 1). After incubation, the membranes were washed with 0.05% Tween-20 in PBS (three  
148 times x 5 min) and incubated for 1 h at RT with 1:2,000 anti-human IgG-HRP (1 mg/ml, BD)  
149 diluted in 1% BSA with 0.05% and Tween-20 in PBS. The membranes with an anti-His Tag-  
150 biotin antibody (Genscript, # A00613) were incubated with Streptavidin-HRP (1:6,000;  
151 Abcam #7403). Finally, membranes were washed with 0.05% Tween-20 in PBS (three  
152 times), once with PBS, and then incubated with an enhanced chemiluminescence Western

153 blot detection system (Femto, ECL, Thermo Scientific # 34094). Proteins evaluated included  
154 ORF1a polyprotein (Invitrogen, #RP-87701), ORF3a (LSBio, #LS-G145920), ORF8  
155 (LSBio, #LS-G145919), NSP1 (R&D systems, #10666-CV), NSP8 (R&D systems, #10633-  
156 CV), NSP9 (R&D systems, #10631-CV), NSP10 (R&D systems, #10630-CV), NSP14 (R&D  
157 systems, #10667-CV), E (Sino Biological, #40609-V10E3) and ME (Sino Biological,  
158 #40598-V07E).

### 159 **2.3 ELISA assays**

160 In-house indirect ELISA assays were performed to detect humoral immunity against  
161 N-SARS-CoV-2 (R&D systems, #10474-CV), M (R&D systems, #10690-CV), E (Sino  
162 Biological, #40609-V10E3), ORF3a (LSBio, #LS-G145920) and NSP8 (R&D systems,  
163 #10633-CV). Briefly, high-binding 96-well ELISA plates (Corning, #9018) were activated  
164 with 100 ng of N and M antigen dissolved in carbonate-bicarbonate buffer (Bioleged 1x,  
165 #421701) for 1 h at 37°C and blocked with 10% m/w milk in PBS 1X - Tween 20 (0.05%)  
166 overnight at 4°C. Denaturing buffer (20 mM monobasic and dibasic phosphate buffer, 0.5  
167 NaCl, and 8 M urea) was used as co-acting buffer to evaluate anti-ORF3a, anti-E, and anti-  
168 NSP8-SARS-CoV-2 (250 ng, 500 ng and 200 ng, respectively). Afterward, the plates were  
169 incubated with sera from participants using serial dilution factors ranging from 1/250 to  
170 1/16,000 (N and M) and 1/50 to 1/1,600 (E, NSP8, and ORF-3a proteins) for 1 h at 37°C  
171 (diluted 1% m/w milk in PBS 1X - Tween 20 (0.05%)). In parallel, a WHO standard curve  
172 (NIBSC code: 20/268) was performed from dilutions of 1/40 to 1/360. Then, the plates were  
173 incubated with anti-human IgG-HRP (BD, # 555788) for 30 min at room temperature in  
174 darkness. Finally, plates were resolved using commercial TMB (BD OptEIA, # 555214),  
175 consisting of a substrate mixture, which was incubated at room temperature for 15 min in



176 darkness. This reaction was stopped using 2N H<sub>2</sub>SO<sub>4</sub>, and the absorbance at 450 nm was  
177 read.

## 178 **2.4 Data analysis**

179 For all ELISA assays, corrected optical density (OD) values were calculated by  
180 obtaining the average between each subject's two replicates and subtracting the  
181 corresponding subject's blank (i.e., the OD measurement from the "inactivated" well) for  
182 each dilution factor. An absorbance cutoff was calculated for each dilution factor to establish  
183 the seropositivity threshold. For each subject, the antibody titer was defined as the highest  
184 dilution factor where the corrected OD was higher than the cutoff value for the corresponding  
185 dilution factor. Geometric Mean of Titers (GMTs) was calculated using all subject titers for  
186 a given visit. A standard curve was used to plot the antibody responses against the M, N, and  
187 NSP8 proteins in the samples as binding arbitrary units (BAU), by using the WHO  
188 International Standard for SARS-CoV-2 antibody (NIBSC code: 20/268), which was  
189 prepared according to the manufacturer's instructions [28]. Data were analyzed using the log  
190 concentration transformed, and the final concentration for each sample was the average of  
191 the product of the interpolated BAU from the standard curve and the sample dilution factor  
192 required to achieve the OD<sub>450</sub> value that fell within the linear quantitative range. Samples  
193 with undetermined concentrations at the lowest dilution tested were assigned the lower limit  
194 of quantification (28.6; 23.6; and 13.5 BAU for N, M, and NSP8, respectively).

195 Statistical differences in GMT values among all the different evaluated times and  
196 proteins by group were assessed using a two-way analysis of variance (ANOVA) with  
197 Tukey's multiple comparison test. Comparisons between CoronaVac-vaccinated individuals  
198 and convalescents subjects were assessed using the Kruskal-Wallis test with Dunn's multiple

199 comparisons test. The significance threshold was set at  $\alpha = 0.05$ . GraphPad Prism 9.0 was  
200 used for data plotting, multiple logistic regression, and ROC curve statistical analyses.  
201

202   **RESULTS**

203   *Kinetics and extent of SARS-CoV-2-specific antibodies responses in convalescents,*  
204   *CoronaVac-vaccinated individuals, and breakthrough cases.*

205           To assess which are those antigens that contribute to the humoral response elicited  
206   after natural infection, vaccination, or infection after vaccination (breakthrough cases), first  
207   we performed dot blot analyses using a subset of non-structural (ORF1a, ORF3a, ORF8,  
208   NSP1, NSP8, NSP9, NSP10, NSP14,) and structural (E and M) recombinant viral proteins  
209   with serum pools from COVID-19 convalescent patients, CoronaVac-vaccinated individuals,  
210   and breakthrough cases. Naïve individuals were also included as controls. In these  
211   experiments, we detected some degree of differential immunoreactivity between the  
212   evaluated groups, mainly for the M and E structural proteins and the non-structural proteins  
213   ORF3a and NSP8 (**Supplementary Figure 1**). We then evaluated the kinetics of the specific-  
214   IgG antibodies for these proteins and the structural N protein by ELISA in convalescent  
215   individuals, subjects vaccinated with two or three doses of CoronaVac, and breakthrough  
216   cases. Subject data and sampling times are detailed in Table 1.

217           As expected, CoronaVac-vaccinated individuals showed a humoral immune response  
218   that was polarized towards structural components within the virion (**Figure 1A-C**).  
219   Remarkably, N-specific IgG antibody titers were significantly elevated only four weeks after  
220   administering the third dose, compared to naïve controls, pre-immune samples, and sera  
221   obtained two weeks after the second dose. Conversely, M-specific antibodies titers showed  
222   a significant increase four weeks after the second dose, similar to those obtained after the  
223   booster dose (**Figure 1A**). There were no significant differences between vaccinated  
224   individuals and the negative controls for the NSP8 and ORF3a antigens (**Figure 1B**). The

225 highest response in the vaccinated group was elicited against the N protein after the booster  
226 dose, which reached 87% seropositivity. In contrast, only around 50% of the individuals had  
227 N-specific antibodies after the second dose or M-specific antibodies after two or three doses  
228 of the vaccine. On the other hand, approximately 20% of the vaccinated individuals displayed  
229 a response against the NSP8 protein (**Figure 1C**).

230         Regarding the convalescent individuals, we detected significant differences in  
231 antibody titers between patients and naïve controls when assessing reactivity towards the N-  
232 structural protein and the NSP8-non-structural protein (**Figure 1D-F**). Sequential samples  
233 from some individuals showed that the antibody response against the N protein was  
234 significantly higher compared to naïve individuals starting two weeks after the onset of the  
235 symptoms and was maintained for up to eight weeks (**Figure 1D**). Moreover, we observed  
236 that the earliest antibody response in the convalescent group was elicited for the NSP8 protein  
237 after one and two weeks from the symptom's onset (**Figure 1E**). The most immunogenic  
238 protein in this group was the N protein, with seropositivity rates ranging from 78 to 89% at  
239 two and four weeks after symptoms onset, respectively, followed by NSP8, which showed a  
240 seropositivity rate of 70 and 63% after one or two weeks, respectively (**Figure 1F**).

241         We next investigated the specific-IgG antibody responses produced in individuals  
242 with symptomatic SARS-CoV-2 infection who were previously vaccinated with two doses  
243 of CoronaVac (breakthrough cases) (**Figure 1G-I**). In this case, the N-specific IgG antibodies  
244 showed the highest levels at both times evaluated, two and four weeks after COVID-19  
245 diagnosis, and showed 100% seropositivity rates. Although the antibody titers for the M  
246 protein did not reach significant levels as compared to naïve controls, they showed high  
247 seropositivity rates within 100 and 89% at two and four weeks after COVID-19 diagnosis,

248 respectively (**Figures 1G and I**). To a lesser extent, we also found a significant difference at  
249 the antibody level between breakthrough cases and naïve controls for the NSP8 after two  
250 weeks, with a seropositivity rate of 40% (**Figures 1H and I**).

251 To harmonize the assessment of the humoral immune response after natural infection,  
252 vaccination, or in breakthrough cases, the WHO has recommended reporting the binding  
253 activity results in binding antibody units (BAU), using the first international standard (IS)  
254 for anti-SARS-CoV-2 immunoglobulin [29–31]. Antibody titers were obtained for the M, N,  
255 and NSP8 proteins as BAU (**Supplementary Figure 2 and Supplementary Table 1**).  
256 Antibody values for other viral proteins could not be reported as BAU, due to the low level  
257 of detection.

258 Overall, our results show that CoronaVac induces a broad humoral immune response,  
259 including high levels of N- and M-specific antibodies in an important percentage of  
260 vaccinated individuals, which was enhanced after natural infection in breakthrough cases. On  
261 the other hand, convalescent individuals who had not been vaccinated before infection  
262 developed a modest but statistically significant increase in antibody response against non-  
263 structural components of the virion.

264

265 ***SARS-CoV-2-IgG responses among CoronaVac-vaccinated individuals, COVID-19***  
266 ***convalescent, and breakthrough subjects***

267 To further investigate differences in the antibody responses between CoronaVac-  
268 vaccinated individuals and COVID-19 convalescent subjects, we analyzed the geometric  
269 mean titers (GMTs) elicited in each group, those vaccinated with two or three doses of

270 CoronaVac, breakthrough cases after two doses of CoronaVac, and convalescent individuals  
271 without prior vaccination. Time-points evaluated were four weeks after the second or booster  
272 dose and four weeks after a positive PCR test for breakthrough cases. We also analyzed data  
273 from convalescent individuals that had sample collection with unspecified dates and samples  
274 from convalescent individuals whose samples were collected four weeks after symptom  
275 onset. A summary of the GMT values and seropositivity rate obtained at these time points  
276 are shown in **Table 2**.

277         Interestingly, the antibody responses were highest among breakthrough cases for the  
278 structural proteins N and M. As shown in **Figure 2**, significant differences of 11 and 18-fold  
279 were observed in terms of the magnitude of the anti-N and anti-M-specific IgG responses  
280 between breakthrough cases and convalescent individuals (GMTs: 11313.7 vs. 1000 and  
281 2939.5 vs. 161.4, respectively). Importantly, convalescent individuals also had binding anti-  
282 M-specific IgG titers that were 4-fold lower than vaccinated individuals that received two or  
283 three vaccine doses, which reached similar GMTs of 688.5 and 643.3, respectively (**Figures**  
284 **2A and B**). We observed no significant difference in the overall levels of the anti-E-specific  
285 antibody responses in vaccinated individuals compared to convalescents, suggesting that  
286 infection or vaccination alone does not induce significant antibody responses against this  
287 protein (**Figure 2C**).

288         Regarding the non-structural proteins evaluated, no differences were observed for the  
289 NSP8 protein, as some vaccinated individuals displayed high titers against this protein, and  
290 all groups reached GMTs of 92.3 and 87.1 after two or three vaccine doses, respectively.  
291 Likewise, breakthrough cases reached a GMT of 107.2 and the convalescent group a GMT  
292 of 149.4 (**Figure 2D**). These results suggest that vaccinated individuals may have had prior

293 exposure to other coronaviruses that elicit cross-reactivity, displaying a nonspecific antibody  
294 immune response against this protein. However, this response was not boosted after natural  
295 exposure to SARS-CoV-2. By contrast, we detected significantly higher ORF3a-specific  
296 antibody titers in convalescent individuals than in CoronaVac-vaccinated subjects (GMT:  
297 44.5 vs. 25 and 27.5 for two or three vaccine doses, respectively) (**Figure 2E**).

298 Finally, we performed a receiver operating characteristic (ROC) analysis to identify  
299 which of the evaluated SARS-CoV-2 proteins may better differentiate CoronaVac-  
300 vaccinated from convalescent individuals. Using this approach, the best performance was  
301 obtained when testing structural proteins but depended on the number of doses administered  
302 to the subjects. On the one hand, high area under the curve (AUC) values were obtained for  
303 the N (0.72; 95%CI:0.56-0.88) and the M proteins (0.69; 95%CI:0.54-0.85) when comparing  
304 vaccinated individuals with CoronaVac-vaccinated individuals receiving only two doses and  
305 convalescents (**Figure 2F**). On the other hand, the N protein showed a low AUC value (0.55;  
306 95%CI:0.38-0.72) when comparing vaccinated individuals receiving the third dose with  
307 convalescents, and in this case, on the contrary, the highest AUC value was achieved for the  
308 M protein (0.73; 95%CI:0.57-0.88) (**Figure 2G**).

309 In summary, these results show that vaccinated individuals have a broader immune  
310 response and higher antibody titers against structural components of SARS-CoV-2 compared  
311 to individuals who underwent a natural infection without prior vaccination.

312

313 *Combination of N- and M-specific antibody responses for differentiating breakthrough*  
314 *cases from vaccinated-only, and convalescents individuals.*

315 As inactivated vaccines elicit a broad humoral immune response against various  
316 antigens, the serological diagnosis of previously vaccinated individuals and the evaluation of  
317 vaccine efficacy in a virus-exposed population is challenging. Next, we performed ROC  
318 analyses to identify SARS-CoV-2 proteins that may differentiate the antibody responses  
319 elicited in breakthrough cases from vaccinated-only individuals and convalescents subjects.

320 As shown in **Figure 3A**, when the humoral immune response elicited in breakthrough  
321 cases is compared with that elicited by individuals vaccinated with two doses of CoronaVac,  
322 we found AUC values of 0.92 (95%CI:0.83-1.0, N), 0.71 (95%CI:0.54-0.89, M), 0.55  
323 (95%CI:0.35-0.75, E), 0.52 (95%CI:0.30-0.74, NSP8), and 0.55 (95%CI:0.33-0.77, ORF3a)  
324 for each protein, suggesting that M and N proteins could be useful for discriminating between  
325 both groups. We further compared individuals who received a booster dose (third dose) and  
326 found a similar tendency with the highest AUC values obtained for the N and M proteins,  
327 0.83 (95%CI:0.68-0.97), and 0.76 (95%CI:0.58-0.94), respectively (**Figure 3B**).  
328 Remarkably, these proteins are also able to differentiate infected subjects without prior  
329 vaccination (convalescents) from breakthrough cases (vaccinated, then infected), with AUC  
330 values up to 0.90 (95%CI:0.77-1.0), for the N protein and 0.93 (95%CI:0.81-1.0), for the M  
331 protein (**Figure 3C**). In addition, we performed multiple logistic regression analyses to  
332 evaluate the capacity of the combined detection of N- and M-specific IgG antibodies to  
333 distinguish breakthrough cases from the other groups evaluated. As shown in **Figures 3D-F**,  
334 the combined data improved the AUC values obtained to 0.95 (95%CI:0.88-1.0), 0.88  
335 (95%CI:0.75-1.0), and 0.98 (95%CI:0.95-1.0), respectively. Importantly, this approach  
336 showed high negative and positive predictive powers of 92% and 80% for differentiating  
337 breakthrough cases with vaccinated individuals that received two doses, and 90% and 73%



338 when compared with subjects vaccinated with the booster dose, and lastly, 90% and 89%  
339 when comparing with convalescent individuals, suggesting this may be a valuable strategy  
340 for serological diagnosis and vaccine efficacy evaluation. Moreover, scatter plots performed  
341 with hypothetical cutoffs of IgG antibody titers showed that it is possible to cluster the  
342 majority of the breakthrough cases in the quadrant with the highest values for N and M  
343 antibody titers (Cutoff  $\geq 1,500$  M or N-specific IgG antibody titers), as compared with  
344 vaccinated-only individuals (two or three doses), or infected-only subjects (convalescents)  
345 **(Figures 3G-I).**

346 Overall, these results suggest that the combination of N- and M-specific IgG antibody  
347 levels could be a reliable biomarker for detecting vaccinated individuals who have had a mild  
348 or asymptomatic SARS-CoV-2 infection and potentially differentiate infected individuals  
349 from those with mixed immunity resulting from infection and vaccination with CoronaVac.

## 350 **DISCUSSION**

351           In the context of the COVID-19 pandemic and mass vaccination campaigns being  
352 deployed around the world, a better understanding of the humoral immune response arising  
353 from either natural infection, vaccination, or infection after vaccination is highly relevant as  
354 a potential diagnostic tool that may help better determine epidemiological surveying and  
355 public health strategies. This may also help identify potential new correlates of protection  
356 against SARS-CoV-2 [32,33]. For the vaccinated individuals, we analyzed the immune  
357 response elicited against a widely used inactivated SARS-CoV-2 vaccine (CoronaVac,  
358 Sinovac Biotech's), given its significant deployment worldwide with billions of doses  
359 administered so far. Because this vaccine consists of whole inactivated SARS-CoV-2, it is  
360 composed of a diverse set of structural antigens that could be presented to the immune  
361 system, and thus it is somewhat expected to elicit a humoral immune response that may  
362 mirror natural infection [34].

363           Interestingly, antibodies raised against SARS-CoV-2 antigens were elicited at  
364 significantly different levels in individuals recovering from natural infection, after  
365 immunization with CoronaVac, and breakthrough cases. Furthermore, we found that  
366 antibody titers directed against the M-SARS-CoV-2 protein were significantly higher in the  
367 case of vaccinated individuals, as opposed to natural infection in unvaccinated individuals.  
368 Importantly, we observed high titers of anti-N antibodies in individuals boosted with an  
369 additional dose of inactivated SARS-CoV-2 vaccine, equivalent to those observed in  
370 convalescent individuals. Regarding breakthrough cases, we found a potent immune response  
371 for the two structural proteins N and M, suggesting that these humoral responses could be  
372 used to differentially detect immunity elicited after natural infection in this vaccinated group,  
373 as opposed to non-vaccinated infected individuals. Although we did not analyze potential

374 correlations between the elicited antibody responses and protection against COVID-19,  
375 previous reports suggest that hybrid immunity, or additional antigen exposure after natural  
376 infection before or after vaccination, is associated with a lower risk of reinfection, as well as  
377 reduced COVID-19 hospitalization when compared to naturally acquired immunity after  
378 infection alone [35,36]. Interestingly, high levels of IgG against the N protein, at the time of  
379 hospital admission, has been correlated with worsen COVID-19 clinical courses [37], which  
380 could be attributed to increased IL-6 production mediated by N-specific IgG antibodies  
381 observed after COVID-19 cytokine storm [38]. On the contrary, high levels of IgG against  
382 the N protein, detected after COVID-19 recovery, have been associated with a long-term  
383 protective effect against re-infections [39]. The effect of other antibodies on the outcome of  
384 COVID-19 has not been explored to date.

385         On the other hand, antibody titers against the ORF3a protein seemed to be elicited  
386 almost exclusively in response to natural infection in non-vaccinated individuals  
387 (convalescents) [40,41]. Therefore, ORF3a-SARS-CoV-2 may represent a biomarker to  
388 differentiate natural SARS-CoV-2 infection from vaccination. Noteworthy, only a fraction  
389 (50%) of the infected individuals responded to this antigen, which should be considered for  
390 further analyses. Furthermore, NSP8-specific antibodies were elicited in a great percentage  
391 of convalescent individuals at early time points (70% during the first week after symptom  
392 onset). Although some individuals in the vaccinated group responded to this antigen, it is  
393 unclear whether they were previously exposed to the virus before vaccination or whether it  
394 corresponds to potential antibody cross-reactivity against other coronaviruses. However,  
395 these findings need to be corroborated in future larger-scale studies to confirm the diagnostic  
396 value of this protein and its potential use as a biomarker for SARS-CoV-2 infection.

397           Importantly, as discussed in the preceding paragraph, our results show that  
398 immunization with CoronaVac, namely three doses, robustly elicits antibodies against the N  
399 and M proteins of SARS-CoV-2 in human volunteers, which to our knowledge has not been  
400 reported before, and which is consistent with the fact that inactivated SARS-CoV-2 vaccines  
401 present a plethora of antigens to the immune system that elicits antibodies against multiple  
402 viral proteins. Notably, as viral variants with multiple mutations in the S protein continue to  
403 emerge, it is of considerable importance the induction of polyclonal responses elicited by  
404 inactivated vaccines that could help to avoid the viral escape [10]. These data complement  
405 our previous findings that reported high titers of anti-S-RBD antibodies and neutralizing  
406 antibodies against SARS-CoV-2 in phase III clinical trials on adult and pediatric volunteers  
407 [9].

408           On the other hand, our results complement findings previously reported for the  
409 SARS-CoV-2 inactivated virus vaccine BBIBP-CorV, where the authors showed that the N  
410 protein, NSP7, and S2-78 peptide may be applied independently or in combination for  
411 effective discrimination between individuals vaccinated with two doses and convalescents  
412 subjects. However, individuals vaccinated with three doses or breakthrough cases were not  
413 included, and M-specific IgG response was not investigated [42]. In another study, the  
414 combined use of ORF3b and ORF8 showed to be accurate serological markers for detection  
415 of early and late SARS-CoV-2 infection, but further studies evaluating their potential to  
416 differentiate convalescent and vaccinated individuals at different time points after  
417 vaccination and/or with different vaccines are missing [43]. Moreover, the specific properties  
418 of the antibodies elicited after vaccination or natural infection, other than neutralization  
419 capacity, should be considered in future studies to accurately identify a correlate of protection  
420 against COVID-19 [36,37].

421 Overall, our results indicate that CoronaVac is immunogenic and that the host can  
422 produce various antibodies against structural proteins of SARS-CoV-2. This could allow for  
423 a potential differential diagnosis based on humoral immune components present in the sera  
424 among subjects undergoing natural infection, vaccinated, or breakthrough cases. Moreover,  
425 our data show that immunization with an inactivated SARS-CoV-2 vaccine induces  
426 significantly higher levels of antibodies against the structural protein M-SARS-CoV-2  
427 compared to natural infection in unvaccinated subjects (convalescent subjects). Interestingly,  
428 natural infection with SARS-CoV-2 elicits significantly higher titers of these antibodies  
429 when the individuals were previously immunized (breakthrough cases) compared to  
430 convalescent subjects. Additionally, we identified an antigen, ORF3a-SARS-CoV-2, against  
431 which antibodies were produced in convalescent subjects at significantly higher titers than in  
432 CoronaVac-immunized individuals.

433 Finally, it will be interesting to confirm the findings reported herein using high  
434 throughput analyses that consider a significant number of samples accompanied with the  
435 corresponding demographic information and details of the timing of the infection and  
436 severity of the reported symptoms for non-vaccinated convalescent individuals and  
437 breakthrough cases. Similarly, knowing the SARS-CoV-2 variant infecting the individuals  
438 could shed light onto potential differences regarding the immunogenicity of these viruses.

439 Taken together, our study reveals different SARS-CoV-2 antigens that could be used  
440 as differential biomarkers, alone or combined among them, for distinguishing between  
441 natural infection-, vaccination-elicited immune memory, or infection after vaccination. Here,  
442 we report that the structural M and N proteins are produced in a high percentage of vaccinated  
443 individuals along with high titers, which are further enhanced after a natural infection. These  
444 data could be helpful not only for serodiagnosis but also for evaluating vaccine efficacy

445 through blood sample determination in the actual context in which SARS-CoV-2 infection is  
446 highly prevalent worldwide.

447 **FUNDING**

448 PATH facilitated sera panels donations for this work. The work was also supported by the  
449 Bill & Melinda Gates Foundation (<https://www.gatesfoundation.org/>) via grants INV-  
450 021239, and INV-016821. Under the grant conditions of the foundation, a Creative  
451 Commons Attribution 4.0 generic License has already been assigned to the Author Accepted  
452 Manuscript version that might arise from this submission. The funders did not have any  
453 additional role in the study design, data collection and analysis, decision to publish, or  
454 preparation of the manuscript. Laboratories providing samples used in this work: Microbial  
455 Pathogenesis Laboratory and Molecular Biomedical Immunology Laboratory at FCB-UC  
456 and accessed through the Washington Covid-19 Biorepository: The Everett Clinic and  
457 Bloodworks Northwest. Scientific-clinical studies that generated serum samples evaluated in  
458 this report (CoronaVac03CL) were supported by the Ministry of Health, Government of  
459 Chile; The Confederation of Production and Commerce, Chile; the Consortium of  
460 Universities for Vaccines and Therapies against COVID-19, Chile; the Chilean Public Health  
461 Institute (ISP); the Millennium Institute on Immunology and Immunotherapy and Sinovac  
462 Life Sciences Co. AMK, SMB and PAG are supported by the National Agency for Research  
463 and Development (ANID) through the Fondo Nacional de Desarrollo Científico y  
464 Tecnológico (FONDECYT) grants N°1190830, N°1170964, and N°1190864, respectively.  
465 The Millennium Institute on Immunology and Immunotherapy (ICN09\_016/ICN 2021\_045;  
466 former P09/016-F) supports AMK, SMB and PAG; The Innovation Fund for  
467 Competitiveness FIC-R 2017 (BIP Code: 30488811-0) supports AMK, SMB and PAG. BDV  
468 is supported by ANID through the National Doctoral Scholarship, fellow #21221163. LFD  
469 is supported by ANID through the Postdoctoral FONDECYT grant # 3210473.

470

471 **ACKNOWLEDGMENTS**

472 Special thanks to Rami Scharf, Miren Iturriza-Gomara and Jorge Flores from PATH for their  
473 support on experimental design and discussion. We also thank the Vice Presidency of  
474 Research (VRI), the Direction of Technology Transfer and Development (DTD), the Legal  
475 Affairs Department (DAJ) of the Pontificia Universidad Católica de Chile. We are also  
476 grateful to the Administrative Directions of the School of Biological Sciences (FCB) and the  
477 School of Medicine (FMed) of the Pontificia Universidad Católica de Chile for their  
478 administrative support.

479



480   **REFERENCES**

481

482

483

484

485

486

487

488

489

490

491

492

493

494

495

496

497

498

499

500

501

502

503

504

505

506

507

508

509

510

511

512

513

514

515

516

517

518

519

520

521

522

523

524

525

1. World Health Organization Global Excess Deaths Associated with COVID-19, January 2020 - December 2021.
2. Richards, F.; Kodjamanova, P.; Chen, X.; Li, N.; Atanasov, P.; Bennetts, L.; Patterson, B.J.; Yektashenas, B.; Mesa-Frias, M.; Tronczynski, K.; et al. Economic Burden of COVID-19: A Systematic Review. *ClinicoEconomics and Outcomes Research* **2022**, *Volume 14*, 293–307, doi:10.2147/CEOR.S338225.
3. Krammer, F. A Correlate of Protection for SARS-CoV-2 Vaccines Is Urgently Needed. *Nature Medicine* **2021**, *27*, 1147–1148, doi:10.1038/s41591-021-01432-4.
4. Nagy, A.; Alhatlani, B. An Overview of Current COVID-19 Vaccine Platforms. *Computational and Structural Biotechnology Journal* **2021**, *19*, 2508–2517, doi:10.1016/j.csbj.2021.04.061.
5. Al-Jighefee, H.T.; Najjar, H.; Ahmed, M.N.; Qush, A.; Awwad, S.; Kamareddine, L. COVID-19 Vaccine Platforms: Challenges and Safety Contemplations. *Vaccines (Basel)* **2021**, *9*, 1196, doi:10.3390/vaccines9101196.
6. Ranzani, O.T.; Hitchings, M.D.T.; Dorion, M.; D’Agostini, T.L.; de Paula, R.C.; de Paula, O.F.P.; Villela, E.F. de M.; Torres, M.S.S.; de Oliveira, S.B.; Schulz, W.; et al. Effectiveness of the CoronaVac Vaccine in Older Adults during a Gamma Variant Associated Epidemic of Covid-19 in Brazil: Test Negative Case-Control Study. *BMJ* **2021**, n2015, doi:10.1136/bmj.n2015.
7. Zhang, Y.; Zeng, G.; Pan, H.; Li, C.; Hu, Y.; Chu, K.; Han, W.; Chen, Z.; Tang, R.; Yin, W.; et al. Safety, Tolerability, and Immunogenicity of an Inactivated SARS-CoV-2 Vaccine in Healthy Adults Aged 18–59 Years: A Randomised, Double-Blind, Placebo-Controlled, Phase 1/2 Clinical Trial. *The Lancet Infectious Diseases* **2021**, *21*, 181–192, doi:10.1016/S1473-3099(20)30843-4.
8. Wu, Z.; Hu, Y.; Xu, M.; Chen, Z.; Yang, W.; Jiang, Z.; Li, M.; Jin, H.; Cui, G.; Chen, P.; et al. Safety, Tolerability, and Immunogenicity of an Inactivated SARS-CoV-2 Vaccine (CoronaVac) in Healthy Adults Aged 60 Years and Older: A Randomised, Double-Blind, Placebo-Controlled, Phase 1/2 Clinical Trial. *The Lancet Infectious Diseases* **2021**, *21*, 803–812, doi:10.1016/S1473-3099(20)30987-7.
9. Bueno, S.M.; Abarca, K.; González, P.A.; Gálvez, N.M.S.; Soto, J.A.; Duarte, L.F.; Schultz, B.M.; Pacheco, G.A.; González, L.A.; Vázquez, Y.; et al. Safety and Immunogenicity of an Inactivated Severe Acute Respiratory Syndrome Coronavirus 2 Vaccine in a Subgroup of Healthy Adults in Chile. *Clinical Infectious Diseases* **2021**, doi:10.1093/cid/ciab823.
10. Melo-González, F.; Soto, J.A.; González, L.A.; Fernández, J.; Duarte, L.F.; Schultz, B.M.; Gálvez, N.M.S.; Pacheco, G.A.; Ríos, M.; Vázquez, Y.; et al. Recognition of Variants of Concern by Antibodies and T Cells Induced by a SARS-CoV-2 Inactivated Vaccine. *Frontiers in Immunology* **2021**, *12*, doi:10.3389/fimmu.2021.747830.
11. Jara, A.; Undurraga, E.A.; González, C.; Paredes, F.; Fontecilla, T.; Jara, G.; Pizarro, A.; Acevedo, J.; Leo, K.; Leon, F.; et al. Effectiveness of an Inactivated

- 526 SARS-CoV-2 Vaccine in Chile. *New England Journal of Medicine* **2021**, 385,  
527 875–884, doi:10.1056/NEJMoa2107715.
- 528 12. Ranzani, O.T.; Hitchings, M.D.T.; Dorion, M.; D’Agostini, T.L.; de Paula,  
529 R.C.; de Paula, O.F.P.; Villela, E.F. de M.; Torres, M.S.S.; de Oliveira, S.B.;  
530 Schulz, W.; et al. Effectiveness of the CoronaVac Vaccine in Older Adults  
531 during a Gamma Variant Associated Epidemic of Covid-19 in Brazil: Test  
532 Negative Case-Control Study. *BMJ* **2021**, n2015, doi:10.1136/bmj.n2015.
- 533 13. Duarte, L.F.; Gálvez, N.M.S.; Iturriaga, C.; Melo-González, F.; Soto, J.A.;  
534 Schultz, B.M.; Urzúa, M.; González, L.A.; Vázquez, Y.; Ríos, M.; et al.  
535 Immune Profile and Clinical Outcome of Breakthrough Cases After  
536 Vaccination With an Inactivated SARS-CoV-2 Vaccine. *Frontiers in*  
537 *Immunology* **2021**, 12, doi:10.3389/fimmu.2021.742914.
- 538 14. Tanriover, M.D.; Doğanay, H.L.; Akova, M.; Güner, H.R.; Azap, A.; Akhan,  
539 S.; Köse, Ş.; Erdiç, F.Ş.; Akalın, E.H.; Tabak, Ö.F.; et al. Efficacy and Safety  
540 of an Inactivated Whole-Virion SARS-CoV-2 Vaccine (CoronaVac): Interim  
541 Results of a Double-Blind, Randomised, Placebo-Controlled, Phase 3 Trial in  
542 Turkey. *The Lancet* **2021**, 398, 213–222, doi:10.1016/S0140-6736(21)01429-  
543 X.
- 544 15. Alencar, C.H.; Cavalcanti, L.P. de G.; Almeida, M.M. de; Barbosa, P.P.L.;  
545 Cavalcante, K.K. de S.; Melo, D.N. de; de Brito Alves, B.C.F.; Heukelbach, J.  
546 High Effectiveness of SARS-CoV-2 Vaccines in Reducing COVID-19-Related  
547 Deaths in over 75-Year-Olds, Ceará State, Brazil. *Tropical Medicine and*  
548 *Infectious Disease* **2021**, 6, 129, doi:10.3390/tropicalmed6030129.
- 549 16. Fiori, M.; Bello, G.; Wschebor, N.; Lecumberry, F.; Ferragut, A.; Mordecki, E.  
550 Decoupling between SARS-CoV-2 Transmissibility and Population Mobility  
551 Associated with Increasing Immunity from Vaccination and Infection in South  
552 America. *Scientific Reports* **2022**, 12, 6874, doi:10.1038/s41598-022-10896-4.
- 553 17. Costa Clemens, S.A.; Weckx, L.; Clemens, R.; Almeida Mendes, A.V.; Ramos  
554 Souza, A.; Silveira, M.B. v; da Guarda, S.N.F.; de Nobrega, M.M.; de Moraes  
555 Pinto, M.I.; Gonzalez, I.G.S.; et al. Heterologous versus Homologous COVID-  
556 19 Booster Vaccination in Previous Recipients of Two Doses of CoronaVac  
557 COVID-19 Vaccine in Brazil (RHH-001): A Phase 4, Non-Inferiority, Single  
558 Blind, Randomised Study. *The Lancet* **2022**, 399, 521–529,  
559 doi:10.1016/S0140-6736(22)00094-0.
- 560 18. Farias, J.P.; da Silva, P. de S.; Fogaça, M.M.C.; Santana, I.V.R.; Luiz, W.B.;  
561 Birbrair, A.; Amorim, J.H. The COVID-19 Humoral Immunological Status  
562 Induced by CoronaVac and AstraZeneca Vaccines Significantly Benefits from  
563 a Booster Shot with the Pfizer Vaccine. *Journal of Virology* **2022**,  
564 doi:10.1128/jvi.00177-22.
- 565 19. Jara, A.; Undurraga, E.A.; Zubizarreta, J.R.; González, C.; Pizarro, A.;  
566 Acevedo, J.; Leo, K.; Paredes, F.; Bralic, T.; Vergara, V.; et al. Effectiveness  
567 of Homologous and Heterologous Booster Doses for an Inactivated SARS-  
568 CoV-2 Vaccine: A Large-Scale Prospective Cohort Study. *The Lancet Global*  
569 *Health* **2022**, 10, e798–e806, doi:10.1016/S2214-109X(22)00112-7.
- 570 20. Tabilo Valenzuela, P.B.; Flores Balter, G.; Saint-Pierre Contreras, G.; Conei  
571 Valencia, D.; Moreno Calderón, C.; Bohle Venegas, C.; Guajardo Rivera, M.;  
572 Silva Ojeda, F.; Vial Covarrubias, M.J. Cellular Immune Response in Patients

- 573 Immunized with Three Vaccine Doses of Different Vaccination Schemes  
574 Authorized by the Chilean Ministry of Health in January 2022. *Life* **2022**, *12*,  
575 534, doi:10.3390/life12040534.
- 576 21. Redondo, N.; Zaldívar-López, S.; Garrido, J.J.; Montoya, M. SARS-CoV-2  
577 Accessory Proteins in Viral Pathogenesis: Knowns and Unknowns. *Frontiers*  
578 *in Immunology* **2021**, *12*, doi:10.3389/fimmu.2021.708264.
- 579 22. Arya, R.; Kumari, S.; Pandey, B.; Mistry, H.; Bihani, S.C.; Das, A.; Prashar,  
580 V.; Gupta, G.D.; Panicker, L.; Kumar, M. Structural Insights into SARS-CoV-  
581 2 Proteins. *Journal of Molecular Biology* **2021**, *433*, 166725,  
582 doi:10.1016/j.jmb.2020.11.024.
- 583 23. Xia, X. Domains and Functions of Spike Protein in SARS-Cov-2 in the Context  
584 of Vaccine Design. *Viruses* **2021**, *13*, 109, doi:10.3390/v13010109.
- 585 24. Ke, Z.; Oton, J.; Qu, K.; Cortese, M.; Zila, V.; McKeane, L.; Nakane, T.;  
586 Zivanov, J.; Neufeldt, C.J.; Cerikan, B.; et al. Structures and Distributions of  
587 SARS-CoV-2 Spike Proteins on Intact Virions. *Nature* **2020**, *588*, 498–502,  
588 doi:10.1038/s41586-020-2665-2.
- 589 25. Romero Ramírez, D.S.; Lara Pérez, M.M.; Carretero Pérez, M.; Suárez  
590 Hernández, M.I.; Martín Pulido, S.; Pera Villacampa, L.; Fernández Vilar,  
591 A.M.; Rivero Falero, M.; González Carretero, P.; Reyes Millán, B.; et al.  
592 SARS-CoV-2 Antibodies in Breast Milk After Vaccination. *Pediatrics* **2021**,  
593 *148*, doi:10.1542/peds.2021-052286.
- 594 26. Barnes, C.O.; Jette, C.A.; Abernathy, M.E.; Dam, K.-M.A.; Esswein, S.R.;  
595 Gristick, H.B.; Malyutin, A.G.; Sharaf, N.G.; Huey-Tubman, K.E.; Lee, Y.E.;  
596 et al. SARS-CoV-2 Neutralizing Antibody Structures Inform Therapeutic  
597 Strategies. *Nature* **2020**, *588*, 682–687, doi:10.1038/s41586-020-2852-1.
- 598 27. Tea, F.; Ospina Stella, A.; Aggarwal, A.; Ross Darley, D.; Pilli, D.; Vitale, D.;  
599 Merheb, V.; Lee, F.X.Z.; Cunningham, P.; Walker, G.J.; et al. SARS-CoV-2  
600 Neutralizing Antibodies: Longevity, Breadth, and Evasion by Emerging Viral  
601 Variants. *PLOS Medicine* **2021**, *18*, e1003656,  
602 doi:10.1371/journal.pmed.1003656.
- 603 28. World Health Organization WHO/BS.2020.2403 Establishment of the WHO  
604 International Standard and Reference Panel for Anti-SARS-CoV-2 Antibody.
- 605 29. Knezevic, I.; Mattiuzzo, G.; Page, M.; Minor, P.; Griffiths, E.; Nuebling, M.;  
606 Moorthy, V. WHO International Standard for Evaluation of the Antibody  
607 Response to COVID-19 Vaccines: Call for Urgent Action by the Scientific  
608 Community. *The Lancet Microbe* **2022**, *3*, e235–e240, doi:10.1016/S2666-  
609 5247(21)00266-4.
- 610 30. Infantino, M.; Pieri, M.; Nuccetelli, M.; Grossi, V.; Lari, B.; Tomassetti, F.;  
611 Calugi, G.; Pancani, S.; Benucci, M.; Casprini, P.; et al. The WHO International  
612 Standard for COVID-19 Serological Tests: Towards Harmonization of Anti-  
613 Spike Assays. *International Immunopharmacology* **2021**, *100*, 108095,  
614 doi:10.1016/j.intimp.2021.108095.
- 615 31. Kristiansen, P.A.; Page, M.; Bernasconi, V.; Mattiuzzo, G.; Dull, P.; Makar, K.;  
616 Plotkin, S.; Knezevic, I. WHO International Standard for Anti-SARS-CoV-2  
617 Immunoglobulin. *The Lancet* **2021**, *397*, 1347–1348, doi:10.1016/S0140-  
618 6736(21)00527-4.

- 619 32. Earle, K.A.; Ambrosino, D.M.; Fiore-Gartland, A.; Goldblatt, D.; Gilbert, P.B.;  
620 Siber, G.R.; Dull, P.; Plotkin, S.A. Evidence for Antibody as a Protective  
621 Correlate for COVID-19 Vaccines. *Vaccine* **2021**, *39*, 4423–4428,  
622 doi:10.1016/j.vaccine.2021.05.063.
- 623 33. Khoury, D.S.; Cromer, D.; Reynaldi, A.; Schlub, T.E.; Wheatley, A.K.; Juno,  
624 J.A.; Subbarao, K.; Kent, S.J.; Triccas, J.A.; Davenport, M.P. Neutralizing  
625 Antibody Levels Are Highly Predictive of Immune Protection from  
626 Symptomatic SARS-CoV-2 Infection. *Nature Medicine* **2021**, *27*, 1205–1211,  
627 doi:10.1038/s41591-021-01377-8.
- 628 34. Sadarangani, M.; Marchant, A.; Kollmann, T.R. Immunological Mechanisms  
629 of Vaccine-Induced Protection against COVID-19 in Humans. *Nature Reviews*  
630 *Immunology* **2021**, *21*, 475–484, doi:10.1038/s41577-021-00578-z.
- 631 35. Bates, T.A.; McBride, S.K.; Leier, H.C.; Guzman, G.; Lyski, Z.L.; Schoen, D.;  
632 Winders, B.; Lee, J.-Y.; Lee, D.X.; Messer, W.B.; et al. Vaccination before or  
633 after SARS-CoV-2 Infection Leads to Robust Humoral Response and  
634 Antibodies That Effectively Neutralize Variants. *Science Immunology* **2022**, *7*,  
635 doi:10.1126/sciimmunol.abn8014.
- 636 36. Nordström, P.; Ballin, M.; Nordström, A. Risk of SARS-CoV-2 Reinfection  
637 and COVID-19 Hospitalisation in Individuals with Natural and Hybrid  
638 Immunity: A Retrospective, Total Population Cohort Study in Sweden. *The*  
639 *Lancet Infectious Diseases* **2022**, *22*, 781–790, doi:10.1016/S1473-  
640 3099(22)00143-8.
- 641 37. Batra, M.; Tian, R.; Zhang, C.; Clarence, E.; Sacher, C.S.; Miranda, J.N.; de La  
642 Fuente, J.R.O.; Mathew, M.; Green, D.; Patel, S.; et al. Role of IgG against N-  
643 Protein of SARS-CoV2 in COVID19 Clinical Outcomes. *Scientific Reports*  
644 **2021**, *11*, 3455, doi:10.1038/s41598-021-83108-0.
- 645 38. Nakayama, E.E.; Kubota-Koketsu, R.; Sasaki, T.; Suzuki, K.; Uno, K.;  
646 Shimizu, J.; Okamoto, T.; Matsumoto, H.; Matsuura, H.; Hashimoto, S.; et al.  
647 Anti-Nucleocapsid Antibodies Enhance the Production of IL-6 Induced by  
648 SARS-CoV-2 N Protein. *Scientific Reports* **2022**, *12*, 8108,  
649 doi:10.1038/s41598-022-12252-y.
- 650 39. Kohler, P.; Güsewell, S.; Seneghini, M.; Egger, T.; Leal, O.; Brucher, A.;  
651 Lemmenmeier, E.; Möller, J.C.; Rieder, P.; Ruetli, M.; et al. Impact of Baseline  
652 SARS-CoV-2 Antibody Status on Syndromic Surveillance and the Risk of  
653 Subsequent COVID-19—a Prospective Multicenter Cohort Study. *BMC*  
654 *Medicine* **2021**, *19*, 270, doi:10.1186/s12916-021-02144-9.
- 655 40. Dugan, H.L.; Stamper, C.T.; Li, L.; Changrob, S.; Asby, N.W.; Halfmann, P.J.;  
656 Zheng, N.-Y.; Huang, M.; Shaw, D.G.; Cobb, M.S.; et al. Profiling B Cell  
657 Immunodominance after SARS-CoV-2 Infection Reveals Antibody Evolution  
658 to Non-Neutralizing Viral Targets. *Immunity* **2021**, *54*, 1290-1303.e7,  
659 doi:10.1016/j.immuni.2021.05.001.
- 660 41. Cheng, L.; Zhang, X.; Chen, Y.; Wang, D.; Zhang, D.; Yan, S.; Wang, H.; Xiao,  
661 M.; Liang, T.; Li, H.; et al. Dynamic Landscape Mapping of Humoral Immunity  
662 to SARS-CoV-2 Identifies Non-Structural Protein Antibodies Associated with  
663 the Survival of Critical COVID-19 Patients. *Signal Transduction and Targeted*  
664 *Therapy* **2021**, *6*, 304, doi:10.1038/s41392-021-00718-w.

- 665 42. Ma, M.-L.; Shi, D.-W.; Li, Y.; Hong, W.; Lai, D.-Y.; Xue, J.-B.; Jiang, H.-W.;  
666 Zhang, H.-N.; Qi, H.; Meng, Q.-F.; et al. Systematic Profiling of SARS-CoV-  
667 2-Specific IgG Responses Elicited by an Inactivated Virus Vaccine Identifies  
668 Peptides and Proteins for Predicting Vaccination Efficacy. *Cell Discovery*  
669 **2021**, 7, 67, doi:10.1038/s41421-021-00309-7.
- 670 43. Hachim, A.; Kavian, N.; Cohen, C.A.; Chin, A.W.H.; Chu, D.K.W.; Mok,  
671 C.K.P.; Tsang, O.T.Y.; Yeung, Y.C.; Perera, R.A.P.M.; Poon, L.L.M.; et al.  
672 ORF8 and ORF3b Antibodies Are Accurate Serological Markers of Early and  
673 Late SARS-CoV-2 Infection. *Nature Immunology* **2020**, 21, 1293–1301,  
674 doi:10.1038/s41590-020-0773-7.
- 675
- 676

677 **TABLES**

678

679 **Table 1.**

680

| <b>Group</b>         | <b>Time point evaluated</b>              | <b>Gender</b> | <b>Age</b>  | <b>Total</b> |
|----------------------|------------------------------------------|---------------|-------------|--------------|
| <b>Vaccinated</b>    | Pre-immune<br>2nd dose + 2 weeks         | Female        | 18-59 years | 12           |
|                      |                                          |               | > 60 years  | 4            |
|                      | 2nd dose + 4 weeks<br>3rd dose + 4 weeks | Male          | 18-59 years | 5            |
|                      |                                          |               | > 60 years  | 5            |
| <b>Convalescents</b> | 1 week<br>2 weeks<br>4 weeks<br>8 weeks  | Unknown       | Unknown     | 10           |
|                      | Unspecified                              | Unknown       | Unknown     | 9            |
| <b>Breakthrough</b>  | 2 weeks<br>4 weeks                       | Female        | 18-59 years | 3            |
|                      |                                          |               | > 60 years  | 0            |
|                      |                                          | Male          | 18-59 years | 4            |
|                      |                                          |               | > 60 years  | 3            |
| <b>Naïve</b>         | Before the year 2020                     | Unknown       | Unknown     | 10           |



**Table 2. Seroconversion rates and geometric mean titers (GMTs) of antibodies against SARS-Cov-2 proteins**

| <b>ANTIBODIES DETECTED</b> | <b>INDICATORS</b>       | <b>2<sup>ND</sup> DOSE + 4 WEEKS</b> | <b>3<sup>RD</sup> DOSE + 4 WEEKS</b> | <b>BREAKTHROUGH + 4 WEEKS</b> | <b>CONVALESCENTS + 4 WEEKS</b> | <b>CONVALESCENTS UNSPECIFIED</b> |
|----------------------------|-------------------------|--------------------------------------|--------------------------------------|-------------------------------|--------------------------------|----------------------------------|
| <b>Anti-N IgG</b>          | GMT                     | 389.58                               | 1433.96                              | 11313.71                      | 933.03                         | 1080.06                          |
|                            | 95% CI                  | 197.27-769.37                        | 736.33 - 2792.54                     | 3951.77 - 32390.55            | 438.27 - 1986.35               | 406.66 - 2868.58                 |
|                            | Seropositivity Rate (%) | 44                                   | 88                                   | 100                           | 90                             | 89                               |
| <b>Anti-M IgG</b>          | GMT                     | 688.50                               | 643.33                               | 2939.47                       | 168.24                         | 170.10                           |
|                            | 95% CI                  | 298.68 - 1587.12                     | 295.06 - 1402.67                     | 734.28 - 11767.36             | 81.33 - 348.02                 | 83.59 - 346.12                   |
|                            | Seropositivity Rate (%) | 46                                   | 55                                   | 89                            | 10                             | 11                               |
| <b>Anti-E IgG</b>          | GMT                     | 232.03                               | 224.49                               | 174.11                        | 125.99                         | 174.11                           |
|                            | 95% CI                  | 151.12-356.25                        | 133.11 - 378.60                      | 104.33 - 290.56               | 69.57 - 228.18                 | 37.34 - 811.82                   |
|                            | Seropositivity Rate (%) | 43                                   | 33                                   | 40                            | 29                             | 20                               |
| <b>Anti-NSP8 IgG</b>       | GMT                     | 92.31                                | 87.06                                | 107.18                        | 164.07                         | 92.59                            |
|                            | 95% CI                  | 59.26 - 143.80                       | 55.80 - 135.82                       | 44.08, 260.61                 | 48.85, 551.01                  | 36.18, 236.97                    |
|                            | Seropositivity Rate (%) | 27                                   | 24                                   | 30                            | 57                             | 22                               |
| <b>Anti-ORF3a IgG</b>      | GMT                     | 25.00                                | 25.70                                | 30.78                         | 63.00                          | 25.00                            |
|                            | 95% CI                  | 25.00 - 25.00                        | 24.27 - 27.22                        | 19.23 - 49.27                 | 22.45 - 176.77                 | 25.00 - 25.00                    |
|                            | Seropositivity Rate (%) | 0                                    | 5                                    | 10                            | 50                             | 0                                |

682  
683

684 **FIGURE AND FIGURE LEGENDS**  
685

**Figure 1**

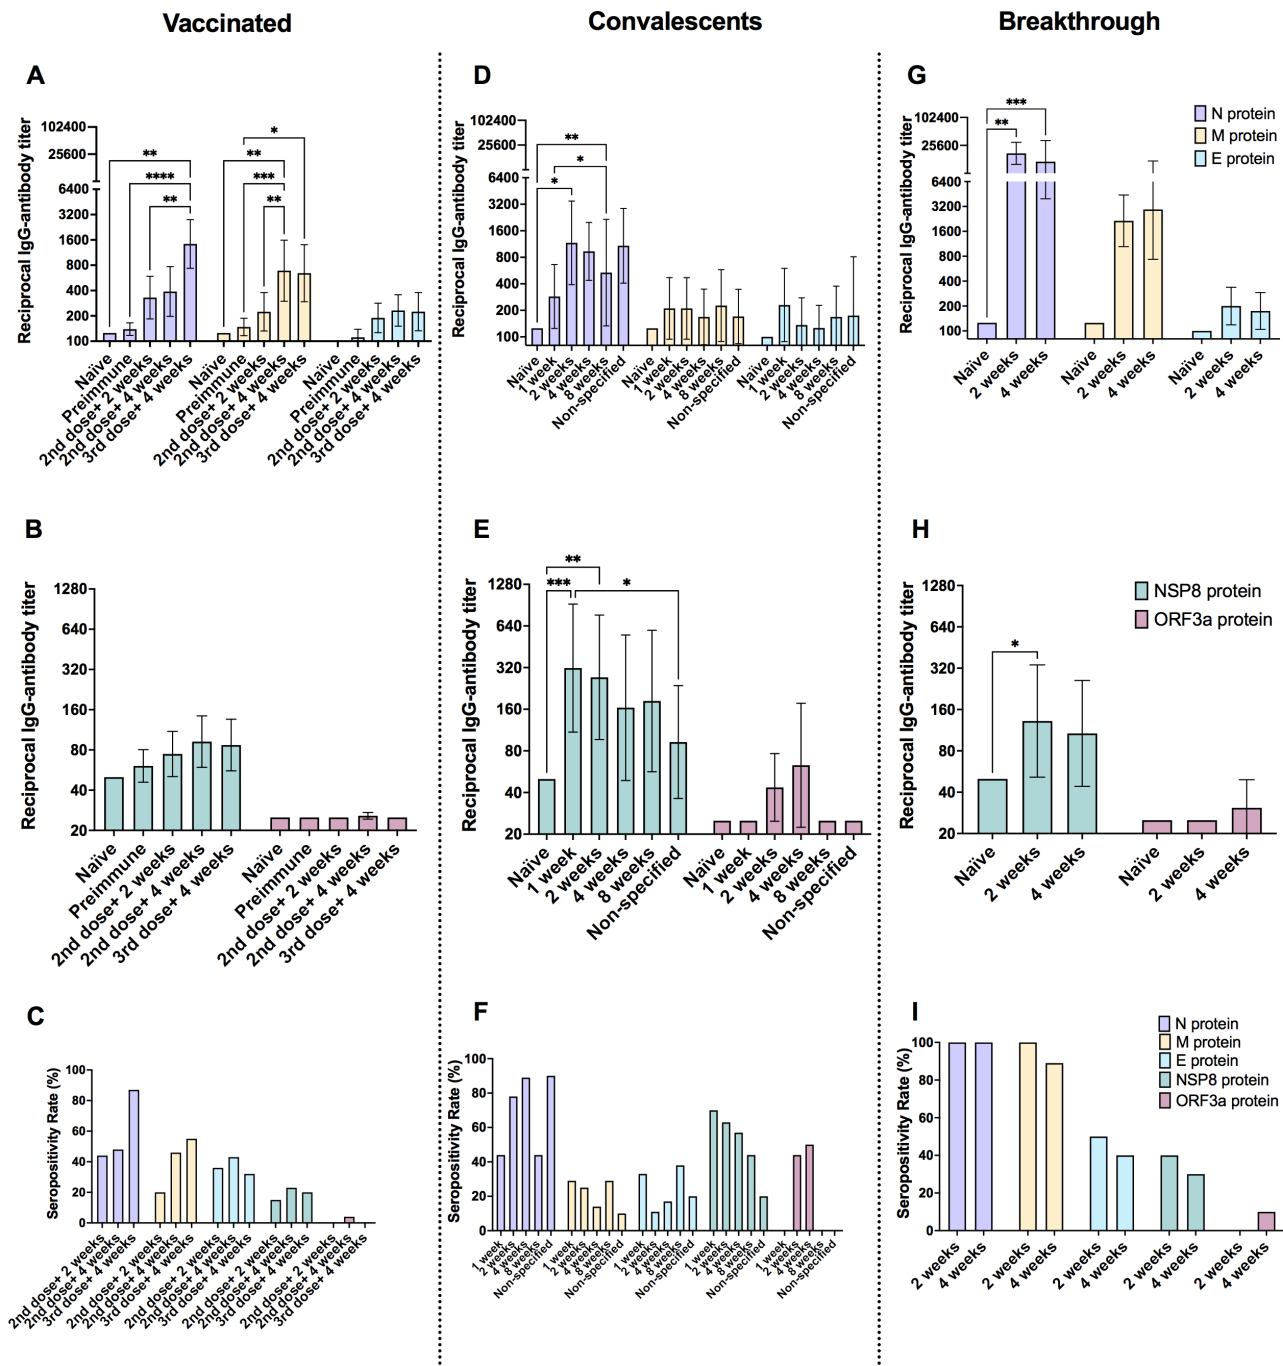

686 **Figure 1. Kinetics of specific anti-IgG levels against multiple structural and non-structural**  
687 **SARS-CoV-2 proteins. A, B, and C.** Serum samples from CoronaVac-vaccinated individuals  
688 were obtained at the moment of the first dose (pre-immune), two and four weeks after the second  
689



690 dose, and four weeks after a booster dose. **D, E, and F.** Convalescent individual serum sampling  
691 was performed at 1, 2, 4, and 8 weeks after recovering from SARS-CoV-2 infection. Nine  
692 convalescent individuals were evaluated without information about the time of sample collection  
693 (Unspecified). **G, H, and I.** Follow-up samples from CoronaVac breakthrough cases (right) were  
694 obtained two and four weeks after a positive PCR result. Serum from ten naïve individuals was  
695 added as controls. Reciprocal antibody titers elicited against structural SARS-CoV-2 proteins (N,  
696 M, and E) are shown in the upper panel. Reciprocal antibody titers elicited against non-structural  
697 SARS-CoV-2 proteins (NSP8 and ORF3a) are shown in the middle panel. The seropositivity rates  
698 were determined for each protein, and the respective time-points evaluated correspond to the lower  
699 panels. Bars show the Geometric Mean Titer (GMT), and the error bars indicate 95% CI. A two-  
700 way ANOVA test was used with Tukey's multiple comparison post-test. \* $p < 0.05$ , \*\* $p < 0.01$ ,  
701 \*\*\* $p < 0.001$ , \*\*\*\* $p < 0.0001$ .

Figure 2

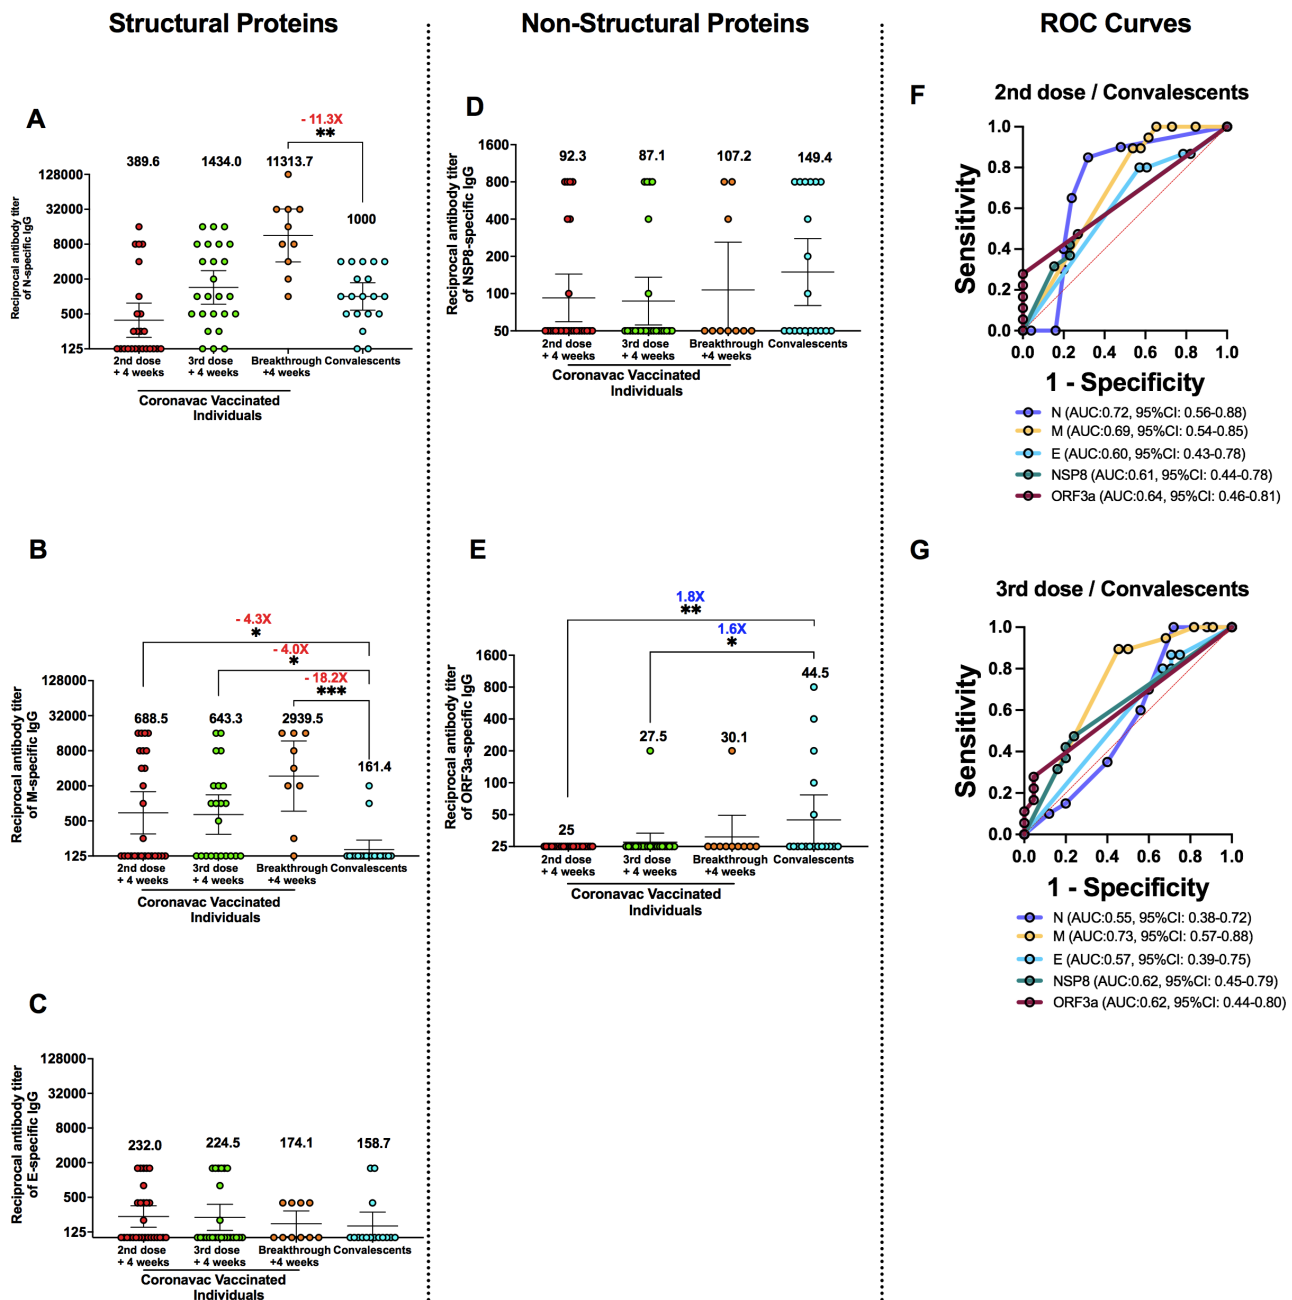

702

703

704

Figure 2. Comparison of antibody levels between convalescent subjects and CoronaVac-

705

vaccinated individuals. Specific IgG antibodies titers in samples collected at four weeks after the

706

second or booster dose in individuals belonging to the vaccinated group and four weeks after the

707

diagnosis of SARS-CoV-2 infection by positive PCR result. Individuals from the breakthrough

708 group were compared with those from the convalescent group (samples obtained four weeks after  
709 the recovery from SARS-CoV-2 infection and individuals for whom there is no data regarding  
710 when the samples were collected). **A, B, and C.** Reciprocal antibody titers against N, M, and E-  
711 specific IgG. **D and E.** Reciprocal IgG specific antibody titers against NSP-8 and ORF3a. The  
712 numbers above the groups show the Geometric Mean Titer (GMT), and the error bars indicate the  
713 95% CI. The numbers in red indicate the fold decrease. The blue text indicates fold increases. A  
714 Kruskal-Wallis test was used with Dunn's multiple comparison post-test, \* $p < 0.05$ , \*\* $p < 0.01$ ,  
715 \*\*\* $p < 0.001$ . **F and G.** ROC analyses of IgG responses to the N (violet), M (yellow), E (blue),  
716 NSP-8 (green), and ORF3a (pink) proteins to compare vaccinated individuals after the  
717 administration of two or three doses of CoronaVac and convalescent subjects, respectively. Area  
718 under the curve (AUC) values are indicated in parenthesis.

Figure 3

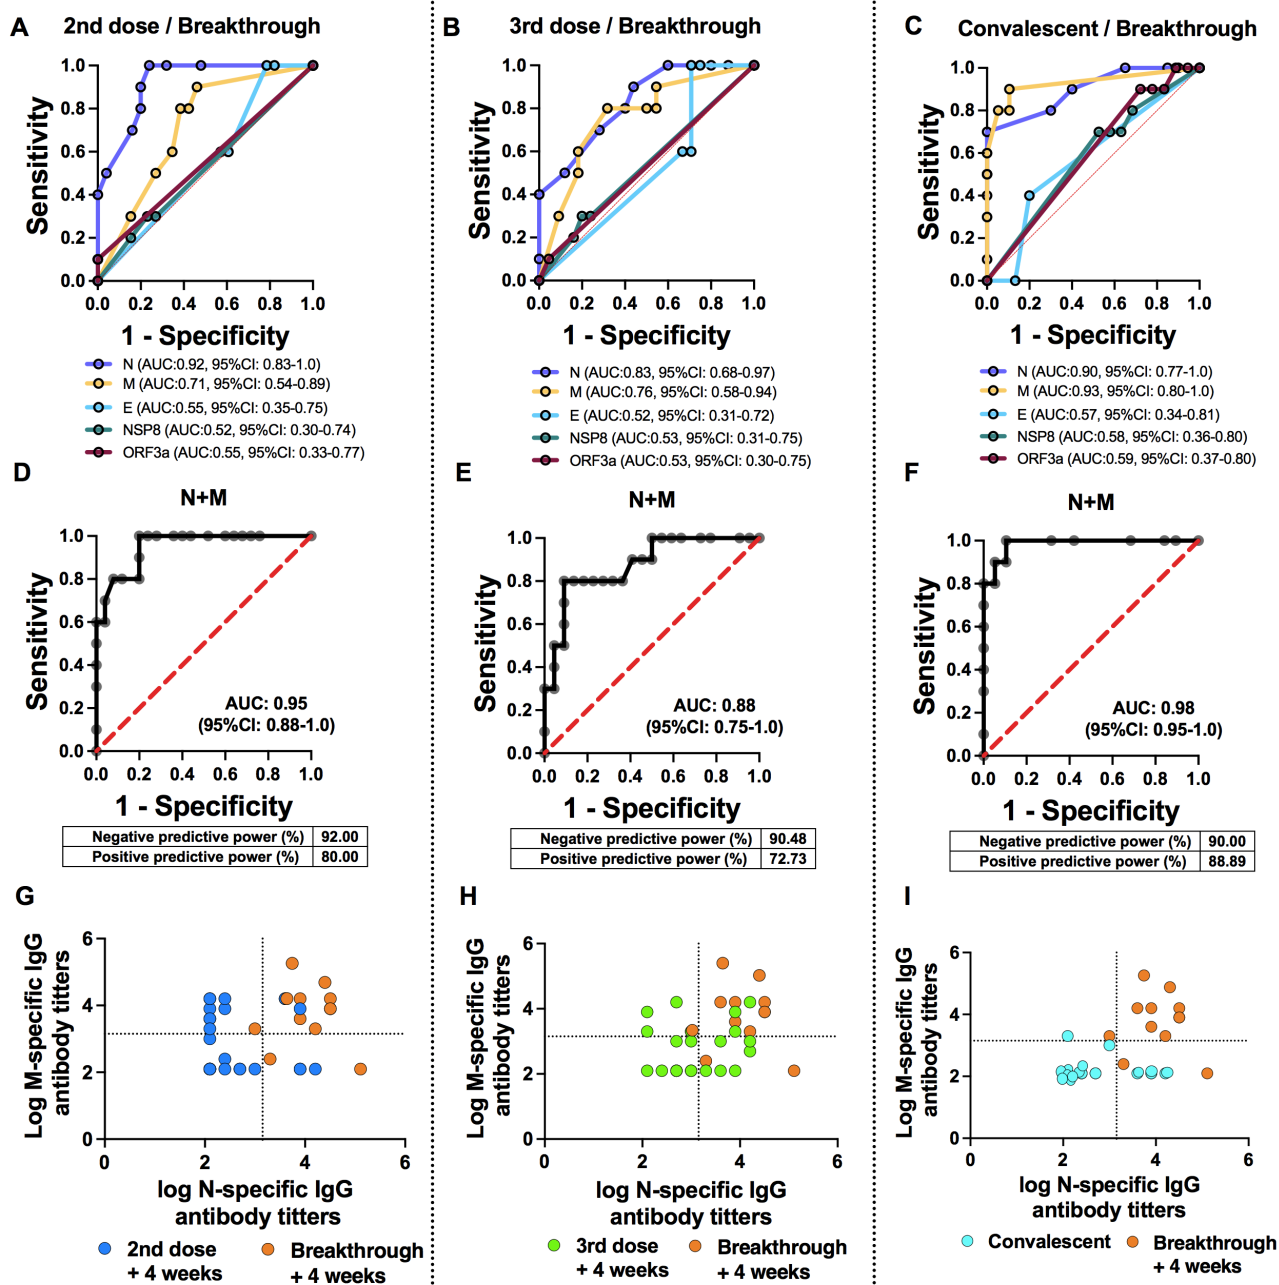

719  
720  
721

Figure 3. ROC analyses of IgG responses to structural and non-structural SARS-CoV-2 proteins for comparing CoronaVac breakthrough cases with vaccinated individuals and convalescent individuals. ROC curves were constructed to identify SARS-CoV-2 proteins that can differentiate breakthrough cases from **A.** individuals that received two doses of CoronaVac. **B.** individuals receiving three doses (two in the primary schedule, plus one booster) of CoronaVac

722  
723  
724  
725

726 **C.** Convalescent individuals. Sera collected four weeks after recovery from infection, vaccination,  
727 and breakthrough cases were analyzed. For the convalescent group, nine individuals with an  
728 unspecified time of sample collection were included. **D, E, and F.** AUC values, negative predictive  
729 power, and positive predictive power for the combinations of M and N antibodies titers to  
730 differentiate the breakthrough cases from **D.** individuals that received two doses of CoronaVac. **E.**  
731 individuals that received three doses of CoronaVac **F.** Convalescent individuals. **G, H and I.**  
732 Scatter plots distributions along with cutoff values for IgG responses based on optimal Youden  
733 values related to ROC curves: convalescent individuals (light blue), individuals vaccinated with  
734 two (dark blue), or three (green) doses, and breakthrough cases (orange).  
735

**Supplementary Table 1. Geometric mean units (GMU) of antibodies against SARS-CoV-2 proteins**

| <b>ANTIBODIES DETECTED</b> | <b>INDICATORS</b> | <b>2<sup>ND</sup> DOSE + 4 WEEKS</b> | <b>3<sup>RD</sup> DOSE + 4 WEEKS</b> | <b>BREAKTHROUGH +4 WEEKS</b> | <b>CONVALESCENTS + 4 WEEKS</b> | <b>CONVALESCENTS UNSPECIFIED INFECTION TIME</b> |
|----------------------------|-------------------|--------------------------------------|--------------------------------------|------------------------------|--------------------------------|-------------------------------------------------|
| <b>Anti-N IgG</b>          | GMU               | 79.1                                 | 197.2                                | 1224.0                       | 127.0                          | 116.7                                           |
|                            | 95% CI            | 41.75- 150.2                         | 96.7 - 402.1                         | 495.4 - 3026                 | 67.84 - 237.7                  | 50.74 - 268.2                                   |
| <b>Anti- M IgG</b>         | GMU               | 246.1                                | 163.9                                | 586.0                        | 51.26                          | 31.9                                            |
|                            | 95% CI            | 136.3 - 444.2                        | 94.75 -283.4                         | 234.1 - 1467                 | 27.53 - 95.46                  | 15.92 - 63.89                                   |
| <b>Anti-NSP8 IgG</b>       | GMU               | 15.5                                 | 14.68                                | 20.5                         | 20.66                          | 23.62                                           |
|                            | 95% CI            | 13.2- 18.31                          | 13.0- 16.57                          | 10.4- 40.4                   | 12.5- 34.11                    | 10.0- 55.59                                     |

739 **Figure S1**

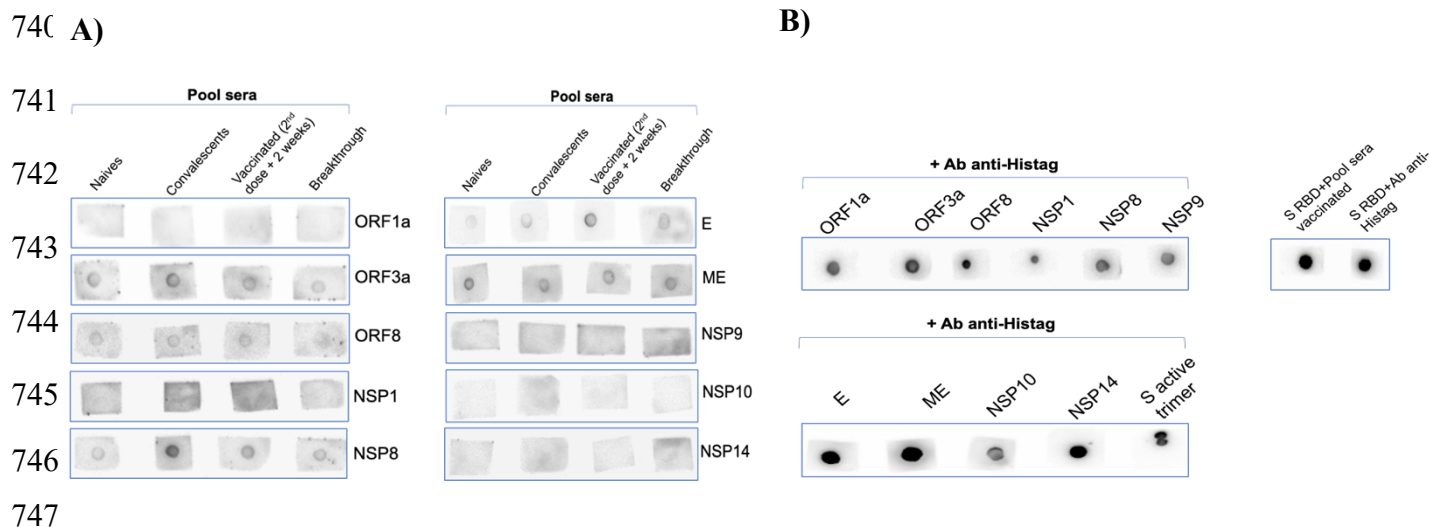

**Figure S1. Anti-SARS-COV-2 antibodies were detected by Dot Blot.** Five hundred nanograms (500 ng) of SARS-CoV-2 recombinant proteins (ORF1a, ORF3a, ORF8, NSP1, NSP8, NSP9, NSP10, NSP14, E (envelop), ME (membrane)) were immobilized in nitrocellulose membranes using 2 uL of proteins prepared in 8M Urea denaturant buffer. The membranes were blocked with 10% BSA and incubated overnight at 4°C with a sera pool obtained from control naïve individuals, convalescents (PCR (+) + 4w), CoronaVac-vaccinated with 2nd dose + 2 weeks, and breakthrough (PCR (+) + 2 weeks) subjects (dilution 1/250). As positive controls, all proteins (500 ng) were incubated with an anti-HisTag antibody conjugated with biotin. After incubation with sera, the membranes were treated with anti-human IgG-HRP. Finally, the membranes were incubated with an enhanced chemiluminescence Western blot detection system (Femto, ECL).

Supplementary Figure 2

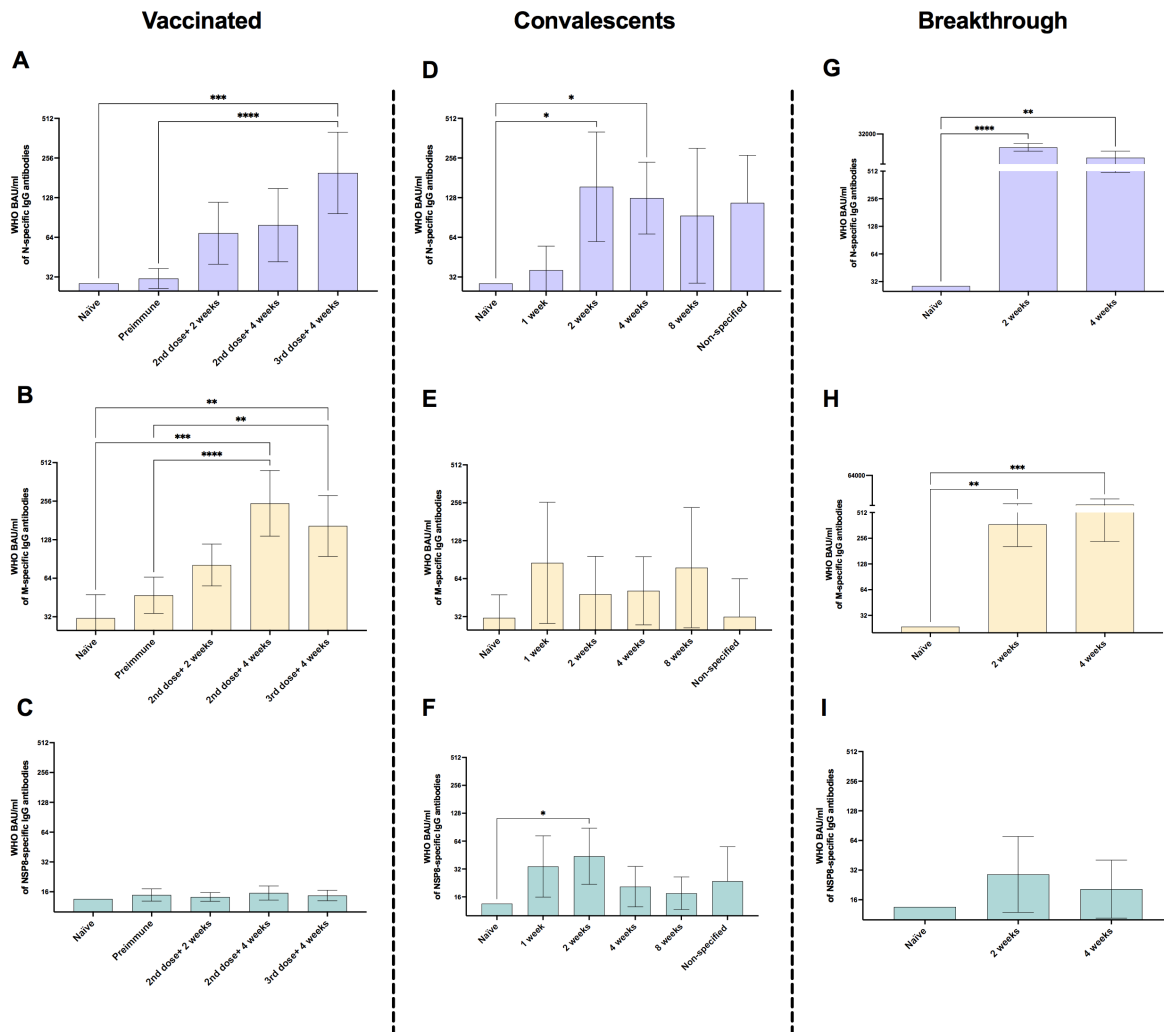

759

760

761

762

763

764

765

766

767

**Figure S2. IgG level kinetics against structural and non-structural SARS-CoV-2 proteins expressed as WHO-binding antibody units (BAU).** Serum samples from CoronaVac-vaccinated individuals were obtained at the first dose (pre-immune), two and four weeks after the second dose, and four weeks after a booster dose for evaluating **A.** N-specific IgG antibodies, **B.** M-specific IgG antibodies, **C.** NSP8-specific IgG antibodies. Serum sampling of convalescent individuals was performed at 1, 2, 4, and 8 weeks after recovery from SARS-CoV-2 infection. Nine convalescent individuals without information regarding the time of sample collection (Unspecified) were included for evaluating, **D.** N-specific IgG antibodies, **E.** M-specific IgG antibodies, **F.** NSP8-



768 specific IgG antibodies. Follow-up samples from breakthrough cases were obtained two and four  
769 weeks after a positive PCR result for evaluating **G.** N-specific IgG antibodies, **H.** M-specific IgG  
770 antibodies, and **I.** NSP8-specific IgG antibodies. Sera from ten naïve individuals were added as  
771 controls. Bars show the Geometric Mean Units (GMU), and the error bars indicate 95% CI. A  
772 Kruskal-Wallis test was used with Dunn's multiple comparison post-test, \* $p < 0.05$ , \*\* $p < 0.01$ ,  
773 \*\*\* $p < 0.001$ , \*\*\*\* $p < 0.0001$ .
